# Supplementary material for: Highly dispersive PEI-modified CDs@ZIF-L dual-emitting fluorescent sensor for detecting metal ions
Source: Royal Society of Chemistry journal article supplement (doi:10.1039/d3ra04250b), 2023-01-01
Supplement: d3ra04250b1.pdf [file d3ra04250b1.pdf]

## Supplementary Materials

### Highly dispersive PEI-modified CDs@ZIF-L dual-emitting fluorescent sensor for detecting metal ions

Xiaoyun Liu <sup>a</sup>, Chunyan Sun <sup>a</sup>, Mingxia Chai <sup>b</sup> and Weijun Song <sup>a,\*</sup>

<sup>a</sup> School of Chemical Engineering, Qinghai University, Xining, 810016, P.R. China.

<sup>b</sup> Key Laboratory of Plateau Ecology and Agriculture, Qinghai University, Xining, 810016, PR China.

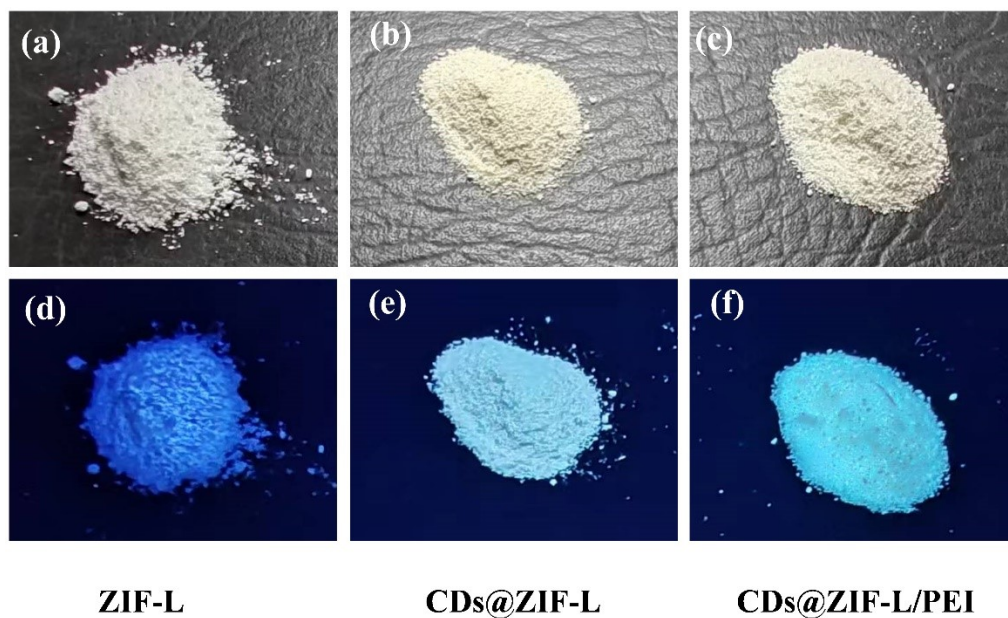

**Fig. S1** Photographs under natural and UV lamp of solid samples ( $\lambda = 365$  nm). (a)(d) ZIF-L; (b)(e) CDs@ZIF-L; (c)(f) CDs@ZIF-L/PEI

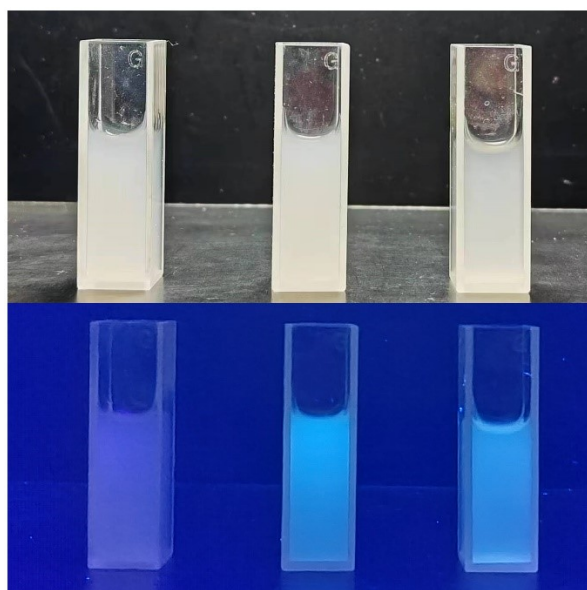

**Fig. S2** Photographs under natural and UV lamp of dispersion samples ( $\lambda = 365$  nm).

From left to right: ZIF-L, CDs@ZIF-L, CDs@ZIF-L/PEI

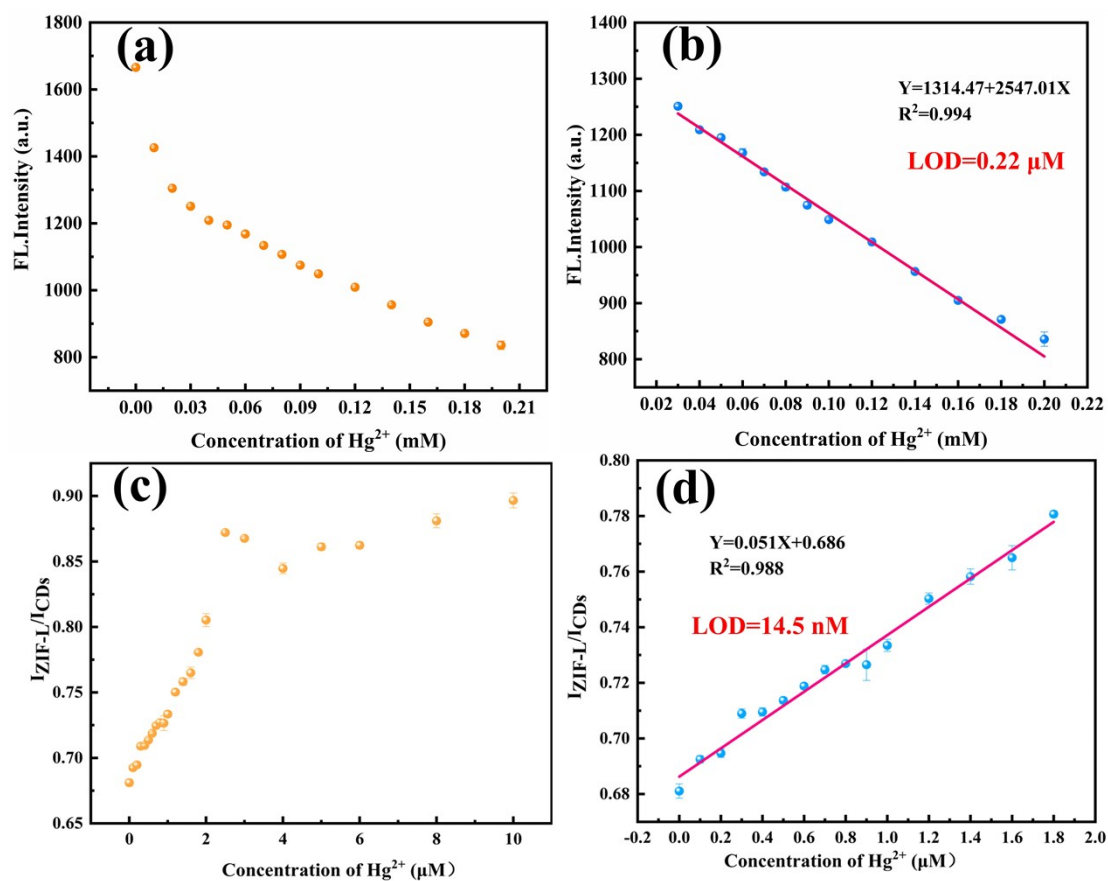

**Fig. S3** (a)(b) The linear equation for the FL intensity quenching in various concentration of  $\text{Hg}^{2+}$  of CDs. (c)(d) The linear equation for the FL quenching ratio in various concentration of  $\text{Hg}^{2+}$  of CDs@ZIF-L/PEI.

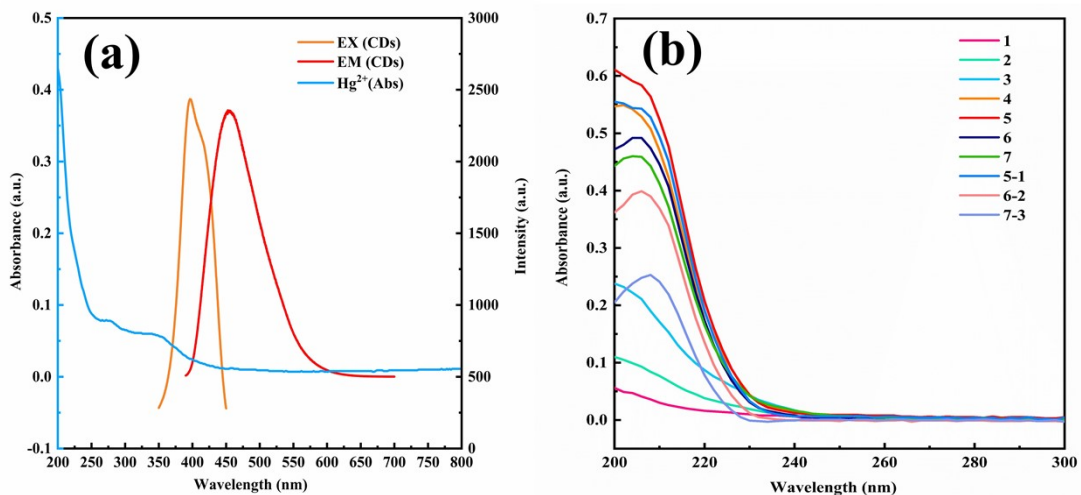

**Fig. S4** (a) Overlap between the excitation, emission bands of CDs and the absorption band of the Hg<sup>2+</sup>. (b) UV-vis absorption spectra of Hg<sup>2+</sup> (1-3: 0.01, 0.02, and 0.04 mM Hg<sup>2+</sup>); (4) CDs@ZIF-L/PEI(1.0mg/ml); CDs@ZIF-L/PEI in the presence of different concentrations of Hg<sup>2+</sup> (5-7: 0.01, 0.02, and 0.04 mM Hg<sup>2+</sup>)
